# Supplementary material
Source: PubMed Central journal article supplement (PMC3234987)

Supplemental figure 1, Wortmann et al.

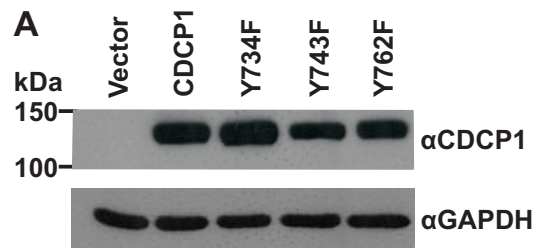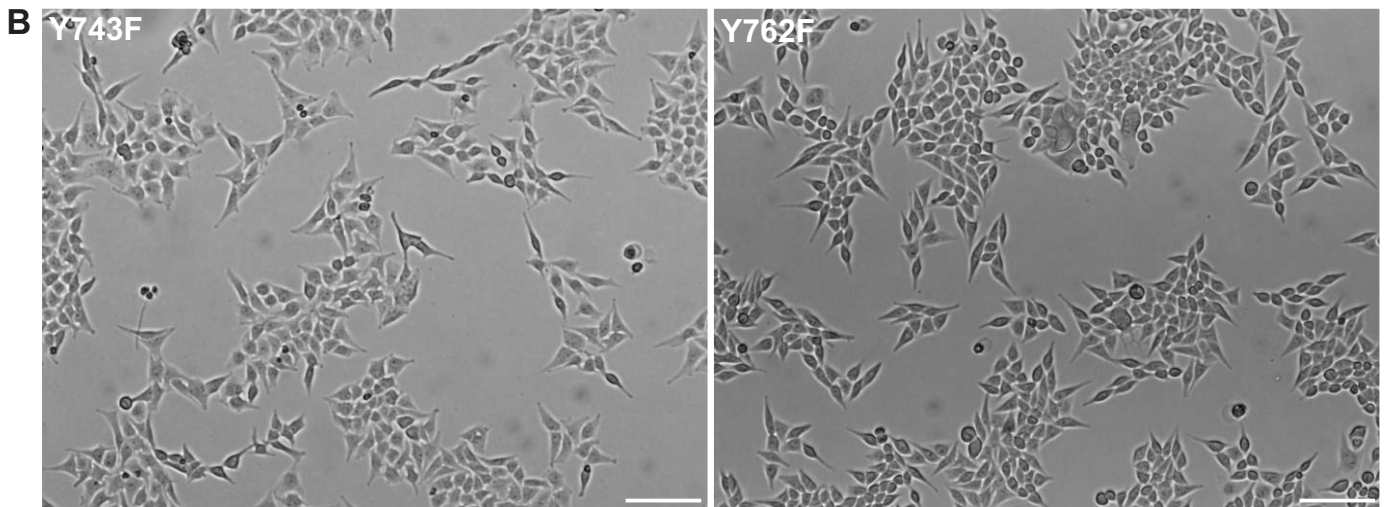

Supplemental figure 2, Wortmann et al.

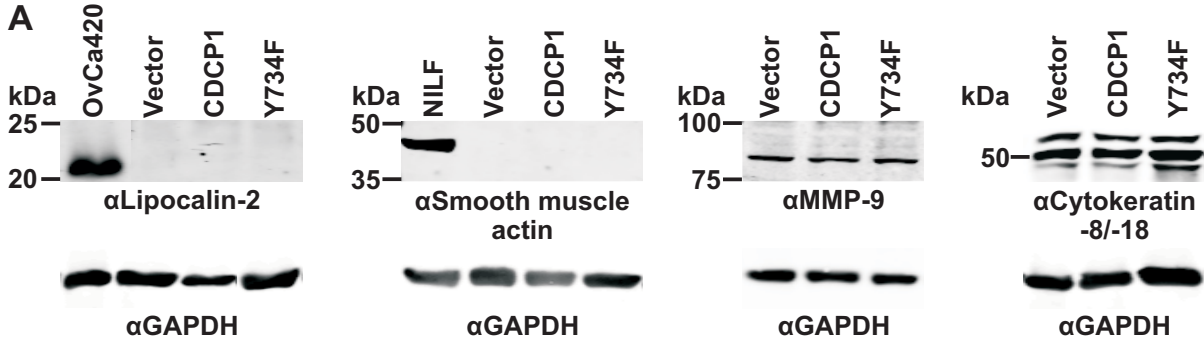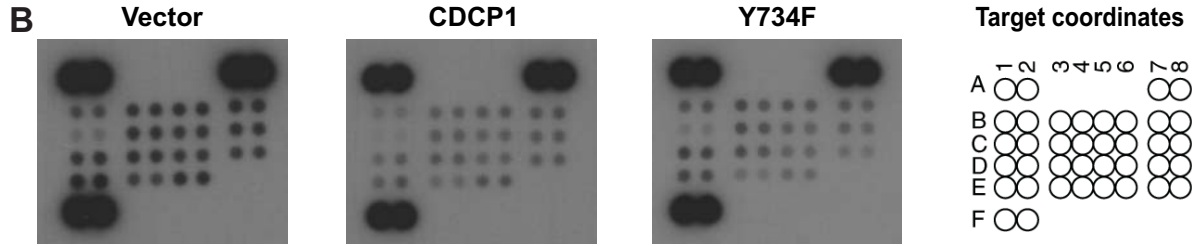

Target proteins of stem cell array

| Target protein/Control | Target Coordinates | Target protein / Control | Target Coordinates |
|------------------------|--------------------|--------------------------|--------------------|
| Oct-3/4                | B1, B2             | TP63/TP73L               | D5, D6             |
| Nanog                  | B3, B4             | Goosecoid (GSC)          | D7, D8             |
| SOX2                   | B5, B6             | Snail                    | E1, E2             |
| E-cadherin             | B7, B8             | VEGF R2/KDR/Flk-1        | E3, E4             |
| α-Fetoprotein (AFP)    | C1, C2             | HCG                      | E5, E6             |
| GATA-4                 | C3, C4             |                          |                    |
| HNF3β/FoxA2            | C5, C6             | Negative control (PBS)   | E7, E8             |
| PDF-1/IPF1             | C7, C8             | Positive control         | F1, F2             |
| SOX17                  | D1, D2             | Positive control         | A1, A2             |
| Otx2                   | D3, D4             | Positive control         | A7, A8             |

Supplemental figure 3, Wortmann et al.

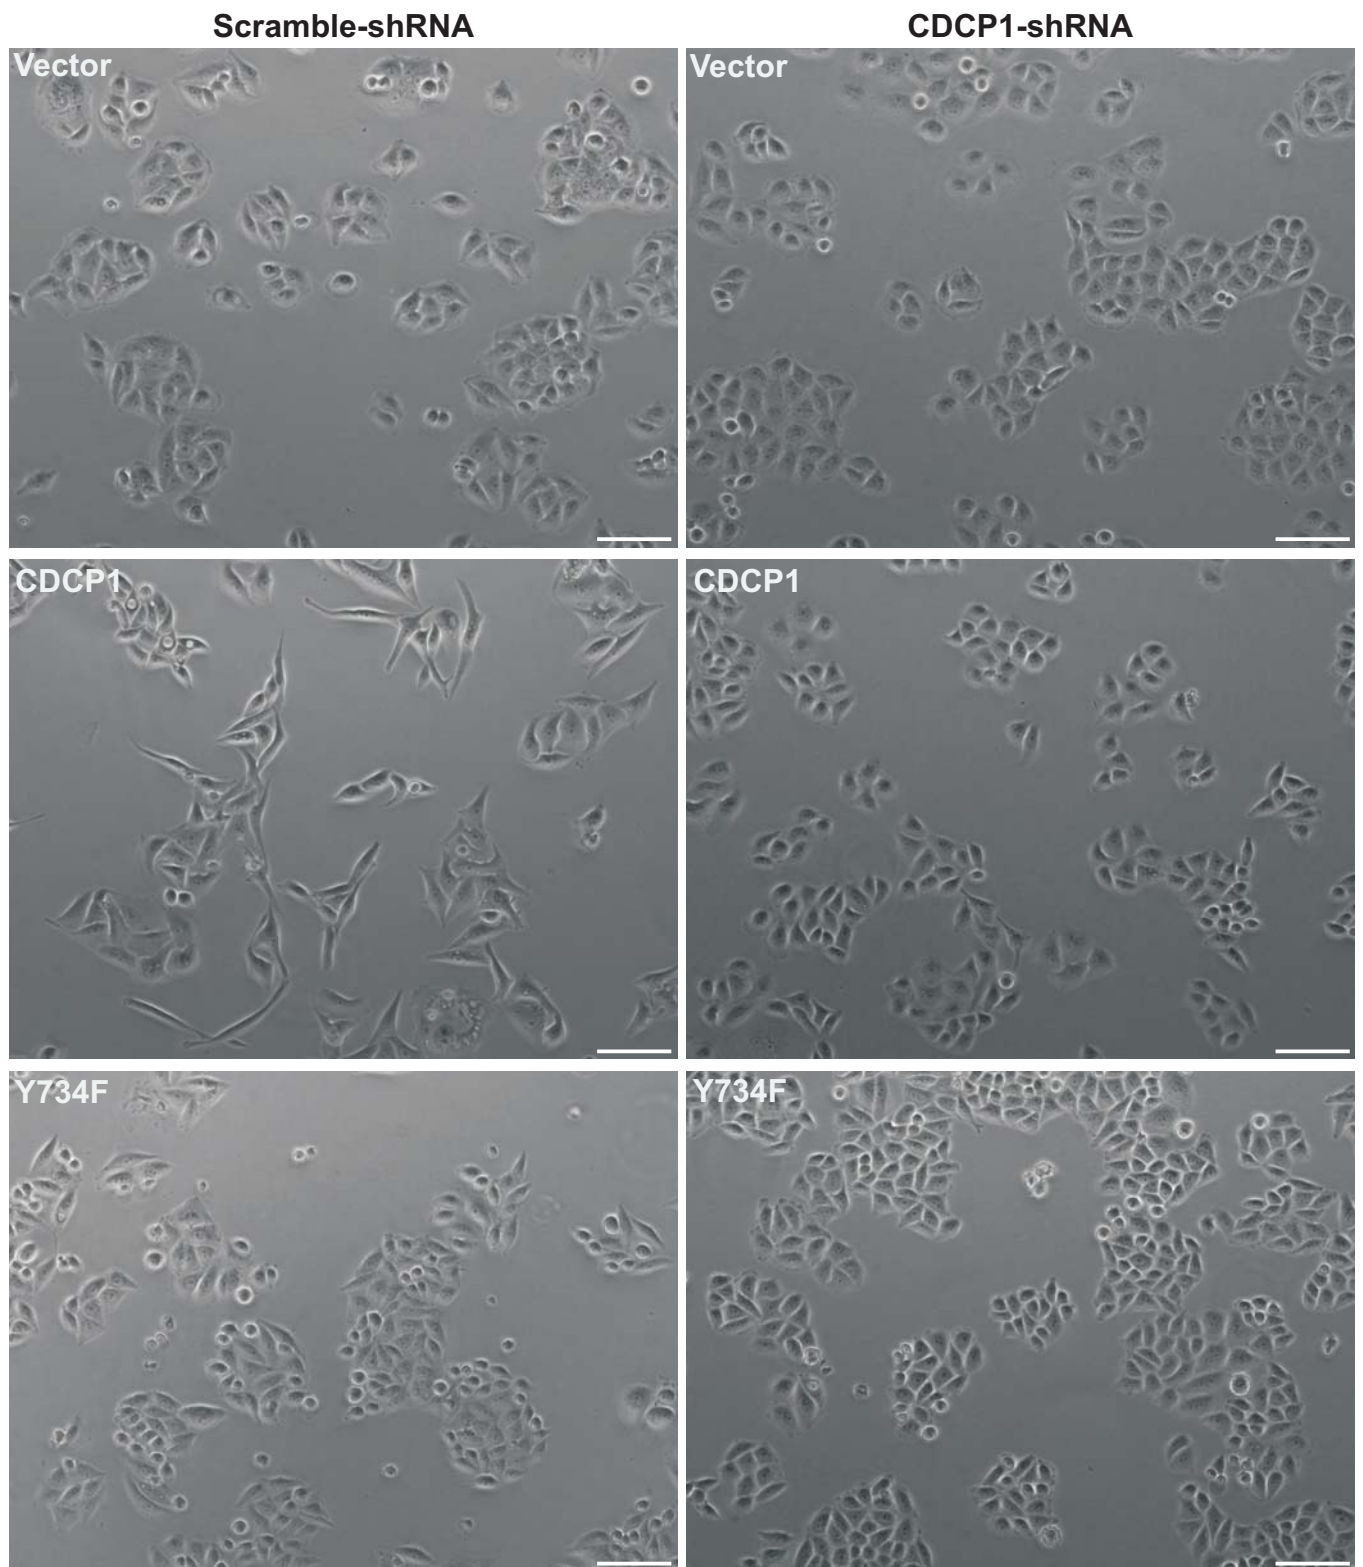

Supplemental figure 4, Wortmann et al.

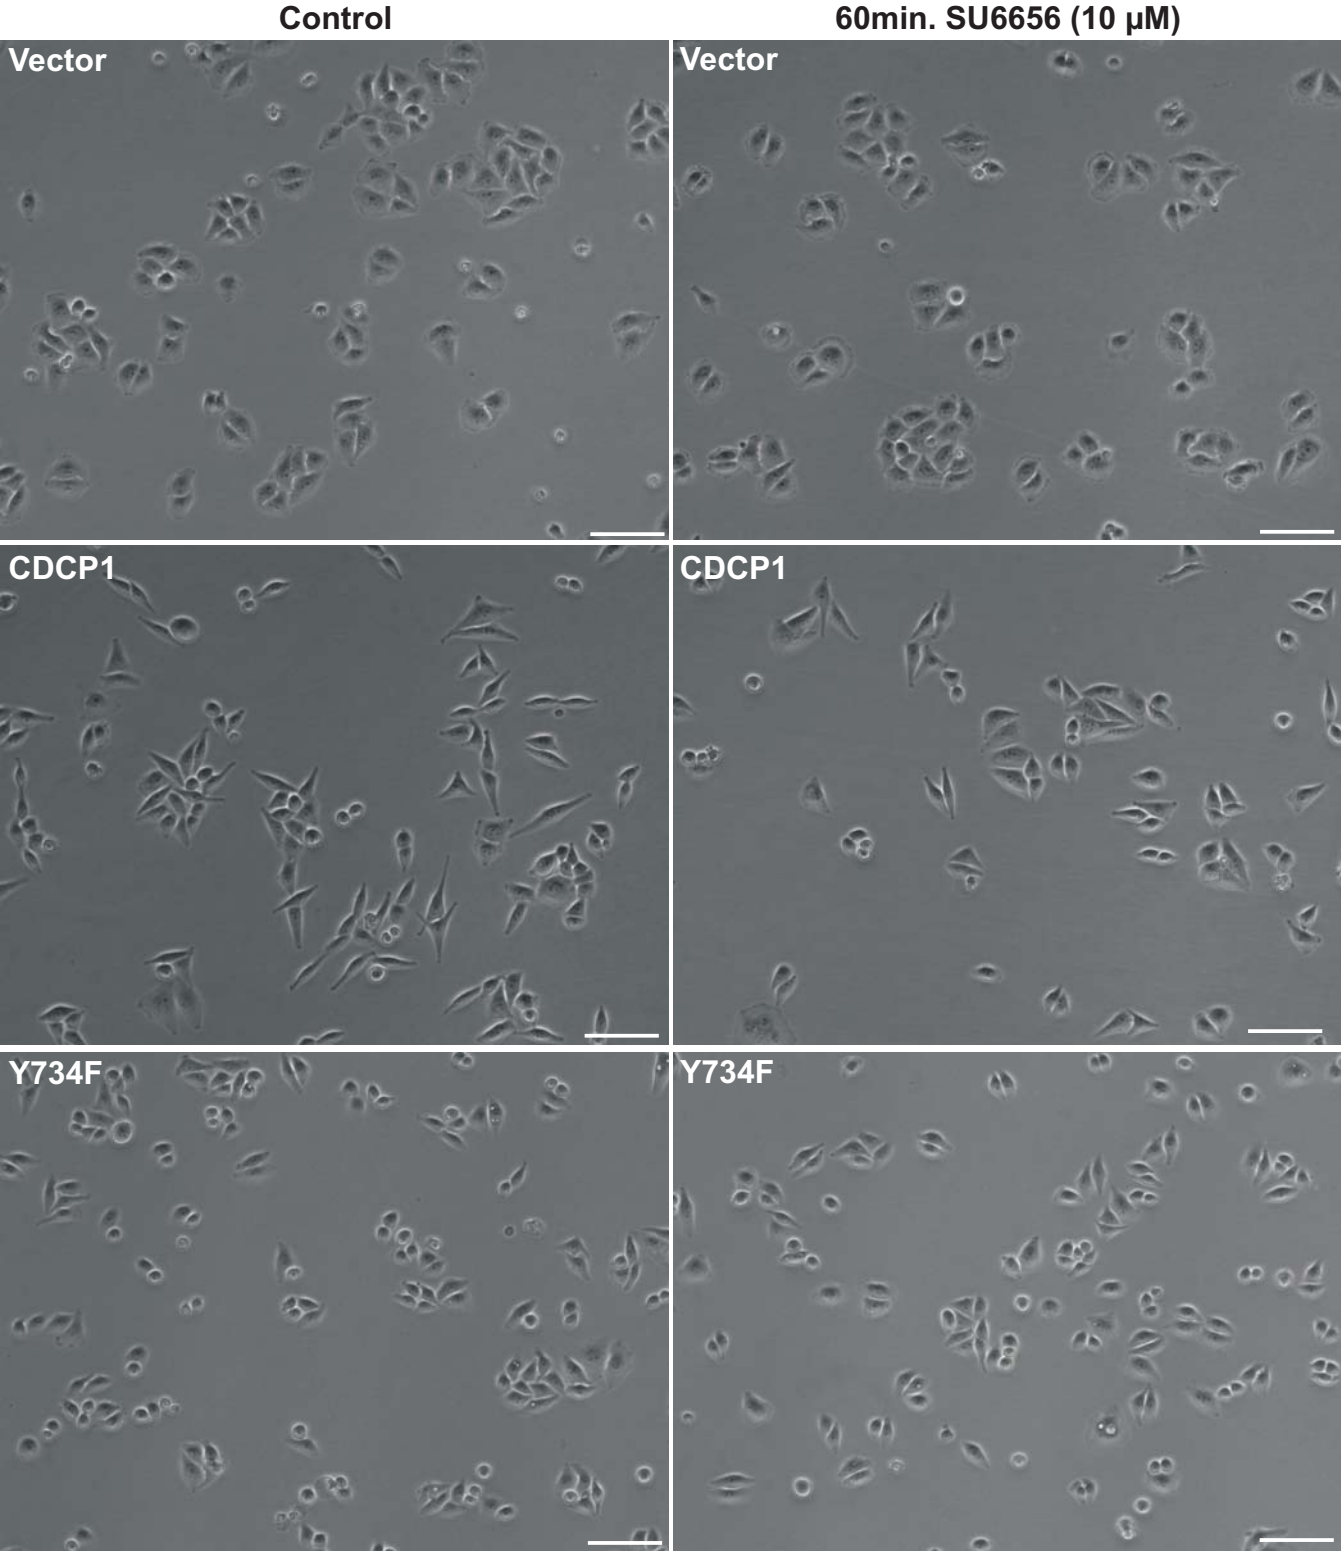

Supplemental figure 5, Wortmann et al.

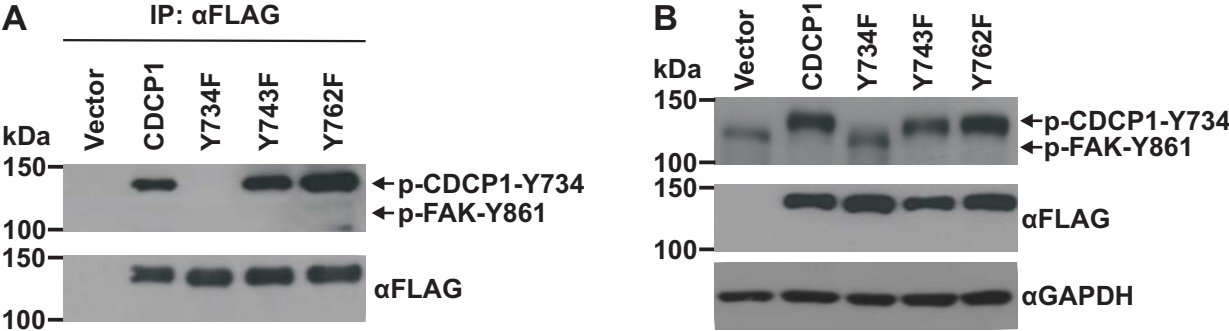

Supplemental figure 6, Wortmann et al.

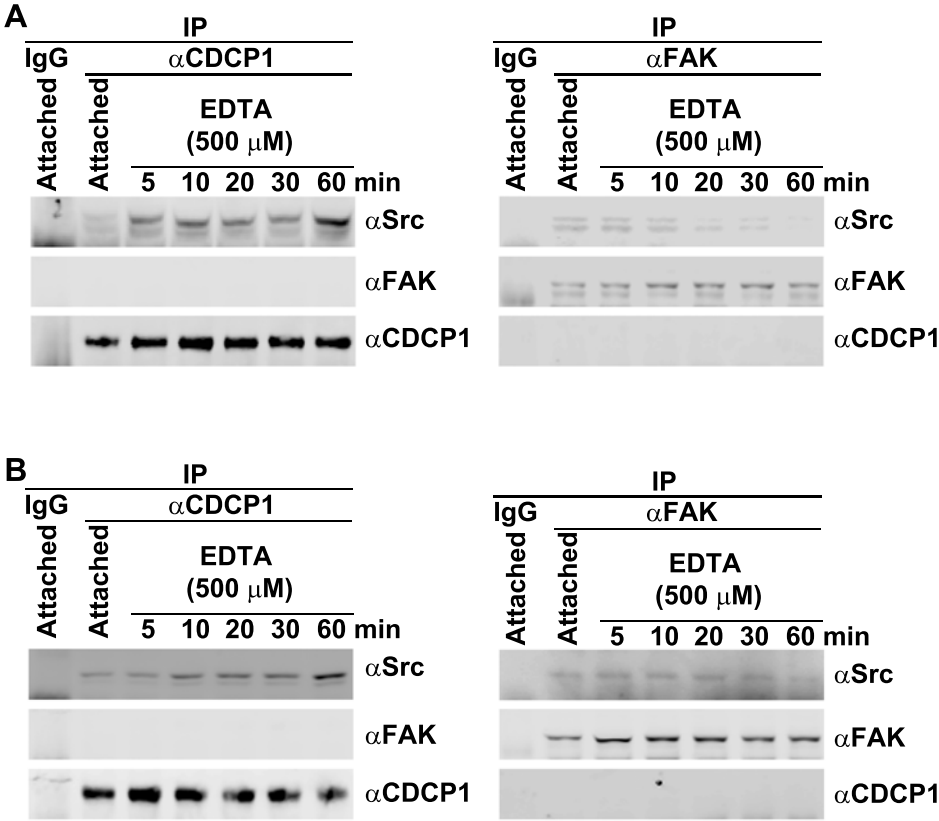

Supplement: supp_M111.227462_jbc.M111.227462-1.pdf [file supp_M111.227462_jbc.M111.227462-1.pdf]
